# Supplementary material for: Low serum progesterone on the day of embryo transfer is associated with a diminished ongoing pregnancy rate in oocyte donation cycles after artificial endometrial preparation: a prospective study
Source: Oxford University Press journal article supplement (doi:10.1093/humrep/dex316), 2017-09-29
Supplement: dex316suppl_table1.pdf [file dex316suppl_table1.pdf]

**Supplementary Table S1** Multinomial logistic regression analysis for ongoing pregnancy rate. Serum Progesterone (P) was compared between the first quartile (<9.2 ng/ml; reference category) and the rest (quartiles 2–4). Other variables were fitted continuously.

|                            | Odds ratio (95% CI) | P      |
|----------------------------|---------------------|--------|
| Serum P                    | 0.297 (0.113–0.779) | 0.013  |
| Endometrial volume (ml)    | 1.027 (0.874–1.207) | 0.747  |
| Age (y)                    | 0.966 (0.893–1.045) | 0.389  |
| BMI (kg/m <sup>2</sup> )   | 1.101 (0.964–1.257) | 0.156  |
| Endometrial thickness (mm) | 1.042 (0.864–1.257) | 0.665  |
| Serum E2 (pg/ml)           | 0.998 (0.996–1.000) | 0.069  |
| No. embryos transferred    | 3.567 (1.762–7.219) | <0.001 |
