# Supplementary material for: Low serum progesterone on the day of embryo transfer is associated with a diminished ongoing pregnancy rate in oocyte donation cycles after artificial endometrial preparation: a prospective study
Source: Oxford University Press journal article supplement (doi:10.1093/humrep/dex316), 2017-09-29
Supplement: dex316suppl_table2.pdf [file dex316suppl_table2.pdf]

**Supplementary Table SII** Multinomial logistic regression analysis for factors associated with having serum progesterone <9.2 ng/ml.

|                            | <b>Odds ratio (95% CI)</b> | <b>P</b> |
|----------------------------|----------------------------|----------|
| Age (y)                    | 0.995 (0.924–1.072)        | 0.903    |
| BMI (kg/m <sup>2</sup> )   | 0.892 (0.787–1.011)        | 0.074    |
| Endometrial thickness (mm) | 1.088 (0.895–1.324)        | 0.397    |
| Serum E2 (pg/ml)           | 1.001 (0.999–1.003)        | 0.261    |
| Days of HRT                | 0.991 (0.917–1.071)        | 0.811    |
